# Supplementary material
Source: PubMed Central journal article supplement (PMC4500671)
Supplement: NIHMS662357-supplement-01.pdf [file NIHMS662357-supplement-01.pdf]

Supplemental Table 1. Time to First Exacerbation in Days Stratified by Baseline Characteristic

| <b>Baseline Characteristic</b>            | <b>PLACEBO</b><br>N=74<br>days (CI <sub>95%</sub> ) | <b>RESCUE</b><br>N=71<br>days (CI <sub>95%</sub> ) | <b>DAILY</b><br>N=72<br>days (CI <sub>95%</sub> ) | <b>COMBINED</b><br>N=71<br>days (CI <sub>95%</sub> ) |
|-------------------------------------------|-----------------------------------------------------|----------------------------------------------------|---------------------------------------------------|------------------------------------------------------|
| All Subjects                              | 84 (28,121)                                         | 102 (59,137)                                       | 109 (49,241)                                      | 134 (90,244)                                         |
| Male                                      | 54 (21,124)                                         | 108 (55,161)                                       | 146 (100,254)                                     | 91 (17,189)                                          |
| Female                                    | 92 (26,136)                                         | 95 (25,138)                                        | 57 (11,291)                                       | 184 (93,259)                                         |
| Age 6-11 years                            | 80 (28,123)                                         | 102 (55,127)                                       | 137 (49,265)                                      | 165 (90,260)                                         |
| Age 12-18 years                           | 88 (7,125)                                          | 110 (29,277)                                       | 76 (14,241)                                       | 95 (1,247)                                           |
| White                                     | 92 (43,123)                                         | 108 (55,137)                                       | 136 (49,254)                                      | 156 (90,247)                                         |
| Non-White                                 | 28 (14,136)                                         | 84 (53,298)                                        | 62 (11,123)                                       | 93 (1,269)                                           |
| Hispanic or Latino                        | 88 (21,153)                                         | 84 (28,127)                                        | 90 (44,245)                                       | 134 (90,269)                                         |
| Non-Hispanic or Latino                    | 80 (32,110)                                         | 112 (63,255)                                       | 117 (35,254)                                      | 139 (18,247)                                         |
| Diagnosed ≤3 years                        | 80 (24,121)                                         | 63 (29,255)                                        | 108 (14,241)                                      | 187 (92,260)                                         |
| Diagnosed > 3 years                       | 88 (22,153)                                         | 108 (82,127)                                       | 169 (35,291)                                      | 92 (18,244)                                          |
| Parental asthma                           | 108 (43,137)                                        | 102 (59,137)                                       | 100 (14,254)                                      | 216 (90,269)                                         |
| No parental asthma                        | 28 (14,97)                                          | 106 (53,255)                                       | 116 (44,265)                                      | 96 (18,189)                                          |
| Eczema                                    | 45 (24,105)                                         | 88 (29,255)                                        | 169 (69,291)                                      | 99 (42,247)                                          |
| No Eczema                                 | 97 (32,125)                                         | 108 (63,137)                                       | 80 (14,254)                                       | 166 (55,259)                                         |
| Skin Test Positive                        | 54 (24,110)                                         | 95 (59,137)                                        | 108 (33,291)                                      | 93 (55,184)                                          |
| Skin Test Negative                        | 136 (18,222)                                        | 199 (112,286)                                      | 105 (11,265)                                      | 244 (146,269)                                        |
| IgE < 350 K/μL                            | 96 (43,125)                                         | 59 (29,161)                                        | 110 (49,254)                                      | 156 (91,244)                                         |
| IgE ≥ 350 K/μL                            | 30 (10,110)                                         | 123 (63,255)                                       | 72 (14,308)                                       | 82 (42,122)                                          |
| FEV <sub>1</sub> reversibility ≥12%       | 54 (22,137)                                         | 63 (29,161)                                        | 59 (11,291)                                       | 99 (91,259)                                          |
| FEV <sub>1</sub> reversibility <12%       | 92 (32,123)                                         | 108 (82,138)                                       | 137 (44,254)                                      | 146 (55,244)                                         |
| Methacholine PC <sub>20</sub> ≤12.5 mg/dL | 54 (24,105)                                         | 86 (55,123)                                        | 69 (33,245)                                       | 122 (90,244)                                         |
| Methacholine PC <sub>20</sub> >12.5 mg/dL | 124 (26,137)                                        | 138 (25,255)                                       | 164 (80,291)                                      | 166 (42,269)                                         |
| eNO <25 ppb                               | 96 (32,125)                                         | 95 (55,138)                                        | 109 (49,241)                                      | 122 (91,244)                                         |
| eNO ≥25 ppb                               | 20 (7,110)                                          | 113 (29,255)                                       | 35 (35,35)                                        | 104 (18,259)                                         |
| Complete run-in asthma control            | 105 (54,136)                                        | 95 (63,127)                                        | 241 (100,265)                                     | 175 (93,260)                                         |
| Incomplete run-in asthma control          | 26 (13,95)                                          | 112 (29,277)                                       | 69 (14,169)                                       | 67 (1,259)                                           |
| ≥1 oral ICS past year                     | 92 (26,137)                                         | 61 (29,286)                                        | 69 (11,245)                                       | 107 (55,244)                                         |
| <1 oral ICS past year                     | 54 (21,123)                                         | 114 (82,161)                                       | 123 (44,254)                                      | 175 (18,260)                                         |

*IgE*, serum immunoglobulin E; *FEV<sub>1</sub>*, forced expiratory volume in 1 second; *PC<sub>20</sub>*, concentration of methacholine that causes a 20% fall in *FEV<sub>1</sub>*; *eNO*, exhaled nitric oxide.

Supplemental Table 2. Mean Asthma Control Days Stratified by Baseline Characteristic

| <b>Baseline Characteristic</b>            | <b>PLACEBO<br/>(N=74)<br/>mean (SD)</b> | <b>RESCUE<br/>(N=71)<br/>mean (SD)</b> | <b>DAILY<br/>(N=72)<br/>mean (SD)</b> | <b>COMBINED<br/>(N=71)<br/>mean (SD)</b> |
|-------------------------------------------|-----------------------------------------|----------------------------------------|---------------------------------------|------------------------------------------|
| All Subjects                              | 0.83 (0.18)                             | 0.81 (0.19)                            | 0.89 (0.14)                           | 0.91 (0.15)                              |
| Male                                      | 0.80 (0.18)                             | 0.79 (0.22)                            | 0.90 (0.13)                           | 0.91 (0.12)                              |
| Female                                    | 0.87 (0.17)                             | 0.83 (0.15)                            | 0.87 (0.16)                           | 0.91 (0.18)                              |
| Age 6-11 years                            | 0.80 (0.19)                             | 0.76 (0.20)                            | 0.87 (0.16)                           | 0.89 (0.17)                              |
| Age 12-18 years                           | 0.89 (0.14)                             | 0.91 (0.10)                            | 0.93 (0.09)                           | 0.94 (0.10)                              |
| White                                     | 0.84 (0.18)                             | 0.82 (0.18)                            | 0.88 (0.14)                           | 0.91 (0.12)                              |
| Non-White                                 | 0.80 (0.18)                             | 0.79 (0.21)                            | 0.92 (0.14)                           | 0.89 (0.20)                              |
| Hispanic or Latino                        | 0.88 (0.12)                             | 0.87 (0.17)                            | 0.91 (0.14)                           | 0.94 (0.09)                              |
| Non-Hispanic or Latino                    | 0.80 (0.20)                             | 0.78 (0.19)                            | 0.88 (0.14)                           | 0.89 (0.17)                              |
| Eczema                                    | 0.80 (0.19)                             | 0.77 (0.20)                            | 0.90 (0.12)                           | 0.89 (0.18)                              |
| No Eczema                                 | 0.86 (0.16)                             | 0.85 (0.17)                            | 0.88 (0.16)                           | 0.93 (0.11)                              |
| Diagnosed ≤3 years                        | 0.82 (0.18)                             | 0.80 (0.17)                            | 0.89 (0.13)                           | 0.88 (0.18)                              |
| Diagnosed >3 years                        | 0.84 (0.18)                             | 0.82 (0.20)                            | 0.89 (0.15)                           | 0.94 (0.10)                              |
| Parental asthma                           | 0.84 (0.17)                             | 0.80 (0.20)                            | 0.88 (0.15)                           | 0.94 (0.07)                              |
| No parental asthma                        | 0.81 (0.20)                             | 0.82 (0.18)                            | 0.91 (0.11)                           | 0.90 (0.13)                              |
| Skin Test Positive                        | 0.80 (0.20)                             | 0.79 (0.20)                            | 0.90 (0.13)                           | 0.90 (0.16)                              |
| Skin Test Negative                        | 0.91 (0.07)                             | 0.89 (0.13)                            | 0.86 (0.17)                           | 0.93 (0.10)                              |
| IgE < 350 K/μL                            | 0.85 (0.17)                             | 0.84 (0.17)                            | 0.87 (0.15)                           | 0.90 (0.17)                              |
| IgE ≥ 350 K/μL                            | 0.77 (0.19)                             | 0.77 (0.22)                            | 0.91 (0.13)                           | 0.94 (0.08)                              |
| FEV <sub>1</sub> reversibility ≥12%       | 0.74 (0.21)                             | 0.77 (0.18)                            | 0.85 (0.15)                           | 0.90 (0.14)                              |
| FEV <sub>1</sub> reversibility <12%       | 0.85 (0.16)                             | 0.82 (0.19)                            | 0.90 (0.14)                           | 0.91 (0.15)                              |
| Methacholine PC <sub>20</sub> ≤12.5 mg/dL | 0.83 (0.18)                             | 0.79 (0.19)                            | 0.88 (0.14)                           | 0.90 (0.17)                              |
| Methacholine PC <sub>20</sub> >12.5 mg/dL | 0.84 (0.17)                             | 0.86 (0.17)                            | 0.90 (0.14)                           | 0.93 (0.09)                              |
| eNO <25 ppb                               | 0.83 (0.18)                             | 0.82 (0.18)                            | 0.89 (0.14)                           | 0.91 (0.15)                              |
| eNO ≥25 ppb                               | 0.84 (0.16)                             | 0.81 (0.17)                            | 0.92 (0.07)                           | 0.89 (0.17)                              |
| Complete run-in asthma control            | 0.88 (0.14)                             | 0.81 (0.19)                            | 0.90 (0.15)                           | 0.94 (0.08)                              |
| Incomplete run-in control                 | 0.73 (0.21)                             | 0.81 (0.18)                            | 0.88 (0.13)                           | 0.84 (0.21)                              |
| ≥1 oral ICS past year                     | 0.82 (0.21)                             | 0.76 (0.23)                            | 0.90 (0.07)                           | 0.92 (0.07)                              |
| <1 oral ICS past year                     | 0.83 (0.17)                             | 0.84 (0.15)                            | 0.88 (0.16)                           | 0.90 (0.17)                              |

IgE, serum immunoglobulin E; FEV<sub>1</sub>, forced expiratory volume in 1 second; PC<sub>20</sub>, concentration of methacholine that causes a 20% fall in FEV<sub>1</sub>; eNO, exhaled nitric oxide.

Acknowledgments (suggested for on-line supplement):

The members of the CARE Network are as follows:

Clinical Centers:

National Jewish Health, Denver: Stanley J. Szefer, MD (Principal Investigator); Gary Larsen, MD (Co-Investigator); Ronina Covar, MD (Co-Investigator); Marzena E. Krawiec, MD (Co-Investigator); Joseph Spahn, MD (Co-Investigator); D Sundström (Center Coordinator); Lina Escobar (Coordinator); Melanie Gleason, PA-C; Sakari Graves (Coordinator); Phillip López (Coordinator); Katie Patterson (Coordinator); Melanie Phillips (Coordinator); Gayle Spears, PA-C; Michael White (Research Assistant).

We also thank the pediatric allergy/immunology and pulmonary fellows for their participation (Jayna Doshi, MD; Richard Hendershot, MD; Brian Kang, MD; Tracy Kruzick, MD; Jonathan Malka, MD; John Prpich, MD; and Grace Tamesis, MD).

University of Wisconsin, Clinical Science Center, Madison: Robert F. Lemanske, Jr. MD (Principal Investigator); Christine A. Sorkness, PharmD, (Co-Investigator); Mark H. Moss, MD (Co-Investigator); Theresa W. Guilbert, MD (Co-Investigator); Christine Virnig, MD (Allergy Fellow); Dan Jackson, MD (Allergy Fellow); David B. Allen, MD (Consultant); Sarah Garibay, RN (Coordinator); Kelly Miller BS (Coordinator); Holly Eversoll, RN (Coordinator); Kathleen Kelly Shanovich, NP; Rick Kelley (Pulmonary Function Manager); Ryan Burton, MS; Lisa Hurley (Coordinator); Lola Awoyinka; Rachel Crawford (Coordinator); Sheila Turcsanyi (Coordinator); Sarah Sund (Coordinator).

University of California San Diego Medical Center and Kaiser Permanente Allergy Center, San Diego: Robert S. Zeiger, MD, Ph.D. (Principal Investigator); Gregory Heldt, MD (Co-Investigator); Michael H. Mellon, MD (Co-Investigator); Michael Schatz, MD (Co-Investigator); Noah J. Friedman, MD (Co-Investigator); Sandra C. Christiansen, MD (Co-Investigator); Kathleen Harden, RN (Coordinator); Terrie Long, RN (Coordinator); Eva Rodriguez, RRT; Elsa Y. Rodriguez, Travis Macaraeg.

Washington University School of Medicine, St. Louis: Robert C. Strunk, MD (Principal Investigator); Leonard B. Bacharier, MD (Co-Investigator); James M. Corry, MD (Co-Investigator); Katherine Rivera-

Spoljaric, MD (Co-Investigator); Caroline Horner, MD (Co-Investigator); Avraham Beigelman, MD (Co-Investigator); Tina Oliver, CCRP, CRT (Coordinator); Valerie Morgan RRT, CCRP (Coordinator); Kevin Hodgdon, RRT, CPFT (Coordinator); Trisha Washington, CPFT (Coordinator); Wanda Caldwell, RRT, MBA (Coordinator), Debbie Pirrello, RRT-NPS; Cindy Moseid (Secretary).

Arizona Respiratory Center, University of Arizona, College of Medicine, Tucson: Fernando D. Martinez, MD (Principal Investigator); Wayne J. Morgan, MD (Co-Investigator); Mark A. Brown, MD (Co-Investigator); James Goodwin, PhD (Research Manager); Monica Vasquez, MPH, MEd (Coordinator); Rosemary Weese, RN, RRT; Silvia Lopez, RN; Jesus Wences, BS (Research Technician), Elizabeth Beckett Firmage (Administrative Coordinator).

University of New Mexico, Albuquerque: Hengameh H. Raissy, PharmD, PhC (Principal Investigator) William Kelly, PharmD (Principal Investigator); Lea Davies, MD (Co-Investigator); Mary Spicher (Coordinator); Franceska Kelly (Coordinator); Christy Batson.

Milwaukee Clinical Center: Elizabeth Bade, MD (Principal Investigator); Dennis Baumgardner, MD (Co-Investigator); Jennifer Evertsen, MS (Project Manager); Ruth Perez (coordinator); Jennifer Kroll (coordinator); Julie Katrichis (data entry).

#### Resource Centers:

Chair's Office, National Jewish Health, Denver, Colorado: Lynn M. Taussig, MD (Study Chair).

Project Office, National Heart, Lung and Blood Institute, Bethesda, Maryland: James Kiley, PhD, (Director of the NHLBI Division of Lung Diseases); Virginia Taggart, MPH (NHLBI Project Scientist); Gail Weinmann MD (Executive Secretary, DSMB); Gang Zheng, PhD.

Data Coordinating Center, Penn State University College of Medicine, Hershey, Pennsylvania: David Mauger, PhD (Principal Investigator);, Vernon M. Chinchilli PhD, (Co-Investigator); Ian Paul, MD (Co-Investigator); Brenda Phillips, MS (Scientific Coordinator); Georgia Brown, RN, MS (Scientific Coordinator); Nora Graber, MS (Scientific Coordinator); Sue Boehmer, MA (Scientific Coordinator);

Loretta Doty (Project Coordinator); Lindsay Texter; Jim Schmidt; Linda Ferrari; Cathy Goeckel; Sherrie Whisler; Brenda Beers; Judy Potteiger; Sara Marlin; Brett Larsen; Linda Miller; Linda Vignati; Chris Mardekian; Victor Sanchez; Vanessa Simmons.

#### Committees:

Data and Safety Monitoring Board: Thomas F. Boat, MD (Chair), Cincinnati Children's Hospital Medical Center, Cincinnati, OH; William C. Bailey, MD, The University of Alabama at Birmingham, Alabama; Mary Kay Garcia, PhD, RN, CPNP, Coto DeCaza, CA; Carolyn M. Kercksmar, MD, Cincinnati Children's Hospital Medical Center, Cincinnati, OH; Lester Lyndon Key, Jr. MD, Medical University of South Carolina, Charleston, SC; James Tonascia, PhD, Johns Hopkins University, Baltimore, MD; Benjamin S. Wilfond, MD, University of Washington School of Medicine, Seattle, WA.

Protocol Review Committee: Philip Ballard, MD, PhD (Chair), University of California San Francisco, San Francisco, CA; Clarence E. Davis, PhD, University of North Carolina, Chapel Hill, NC; Diane E. McLean, MD, PhD, MPH, New York Presbyterian Hospital, New York, NY; Paul O'Byrne, MD, McMaster University, Hamilton, ON; Mark Liu, MD, Johns Hopkins Asthma and Allergy Center, Baltimore, MD; M. Anne Spence, PhD, University of California, Irvine, Irvine, CA; Meyer Kattan, MD, Mount Sinai Medical Center, New York, New York.

Executive Committee: Lynn M. Taussig, MD (Chair); Virginia S. Taggart, MPH; Stanley J. Szeffler, MD; Robert F. Lemanske, Jr., MD; Robert S. Zeiger, MD, PhD; Robert C. Strunk, MD; Fernando D. Martinez, MD; David Mauger, PhD.

Publication and Presentation Committee: Robert F. Lemanske, Jr., MD (Chair); Stanley J. Szeffler, MD; Fernando D. Martinez, MD.

Quality Control Committee: Robert S. Zeiger, MD, PhD, (Chair); Robert C. Strunk, MD; Vernon M. Chinchilli, PhD; Fernando Martinez, MD; Theresa Guilbert, MD; Dave Mauger, PhD; Ian Paul, MD; Brenda Phillips, MS; Sue Boehmer, MA; James Goodwin, PhD; Tina Oliver, CCRP, CRT; D Sundström; James Schmidt, BS; Sarah Garibay, RN; Kelly Miller, BS Holly Eversoll, RN.

Equipment Committee: Wayne Morgan, MD (Chair); Gary Larsen, MD; Christine A. Sorkness, PharmD; Kevin, Hodgdon, Trisha Washington; Rick Kelley; Ryan Burton; Kelly Miller; Sarah Garibay; Holly Eversoll; Lisa Hurley; Jesus Wences; Melanie Phillips; Brenda Phillips; Loretta Doty; Richard Evans; Linda Ferrari, Jeff Davis.

Genetics Committee: Fernando D. Martinez, MD (Chair); Stanley J. Szeffler, MD; Robert F. Lemanske, Jr., MD; Vernon M. Chinchilli, PhD; David T. Mauger, PhD; Brenda Phillips, MS.

Pharmaceutical Suppliers: TEVA Respiratory, LLC, Horsham, PA, donated QVAR and placebo and albuterol.

Equipment and Materials Support: Lincoln Diagnostics donated Multi-Test II kits, Decatur, Illinois; Aerocrine, Inc. New Providence, NJ; VIASYS Healthcare GmbH, Hoechberg, Germany.
